# Supplementary material for: PRMT3 drives glioblastoma progression by enhancing HIF1A and glycolytic metabolism
Source: PubMed Central journal article supplement (PMC9646854; doi:10.1038/s41419-022-05389-1), 2022-11-09

Figure 1F

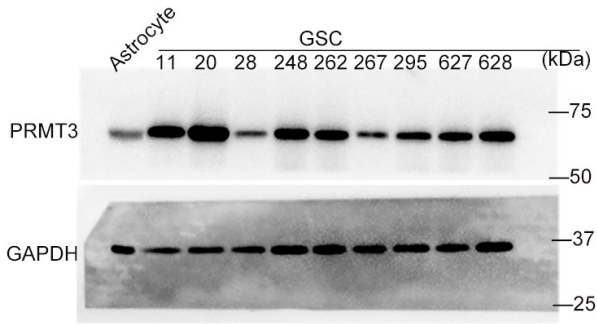

Supplementary Figure 1

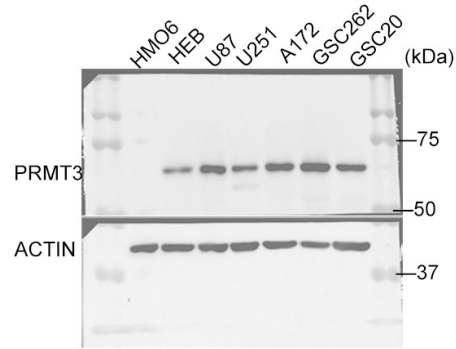

Figure 1H

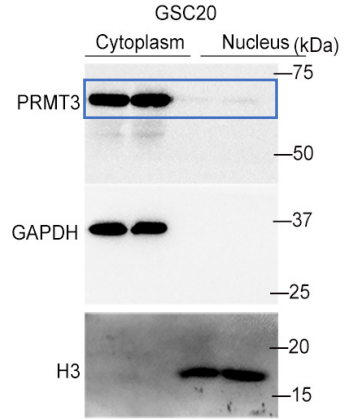

Supplementary Figure 2A

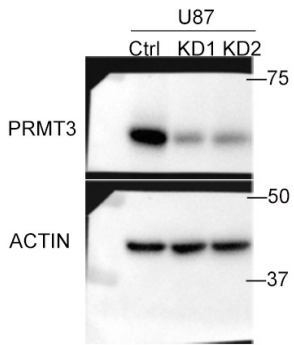

Supplementary Figure 2B

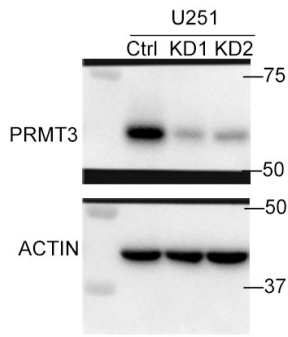

Supplementary Figure 2C

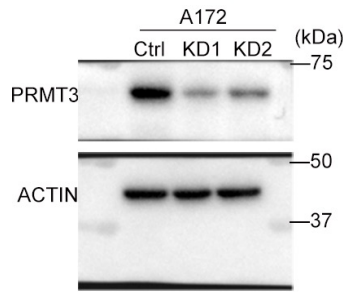

Figure 2F

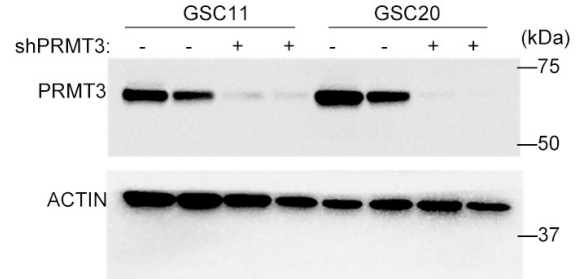

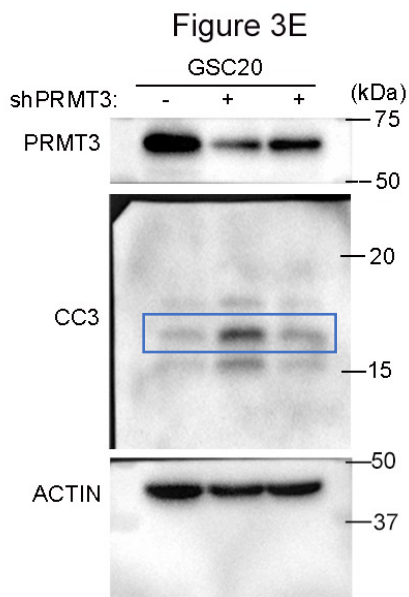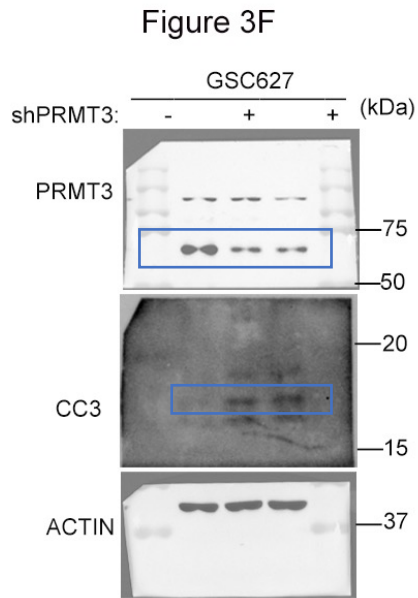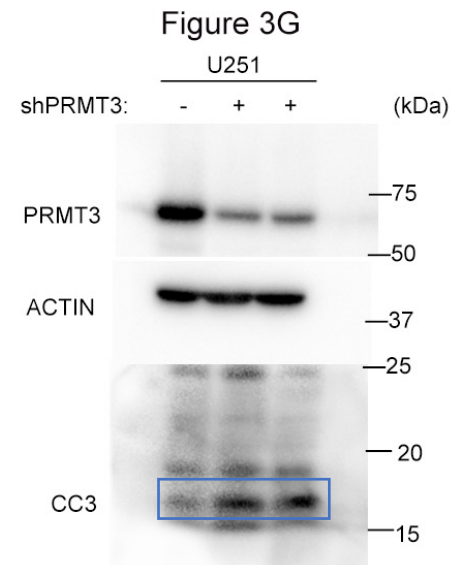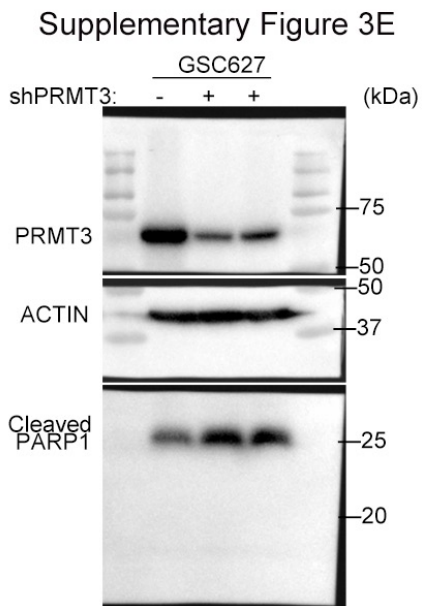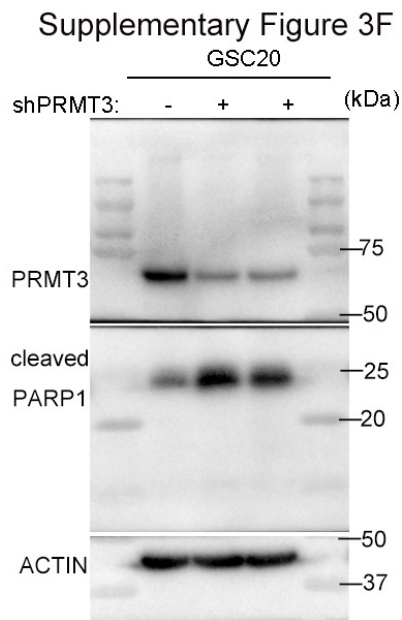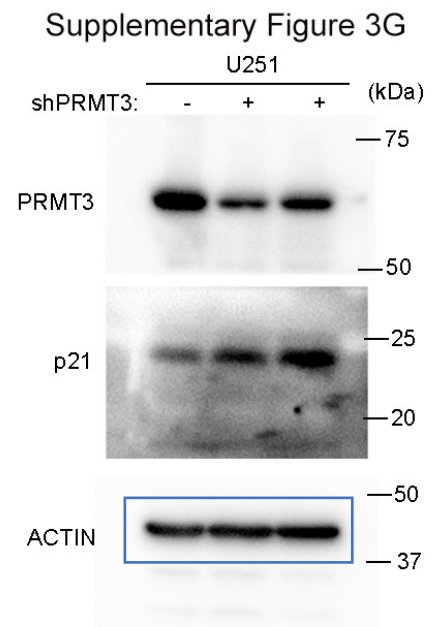

Figure 7C

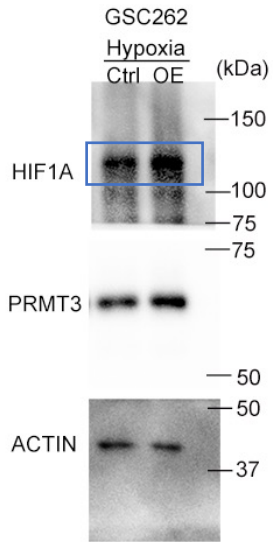

Figure 7D

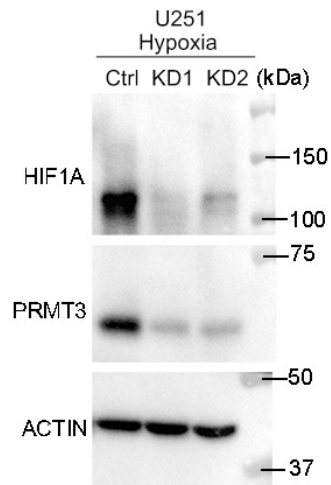

Figure 7E

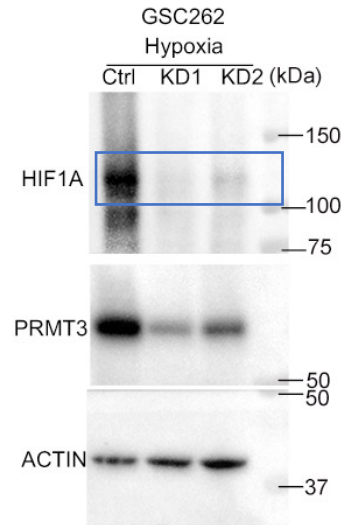

Figure 7G

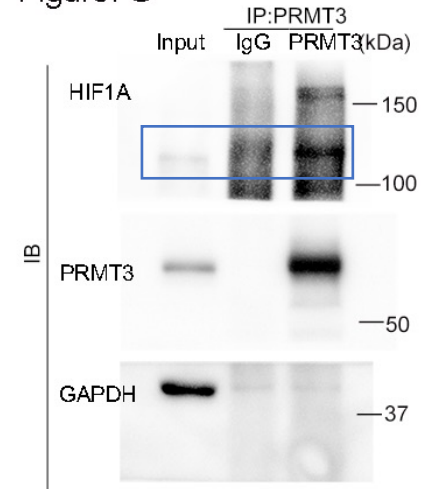

Figure 7F

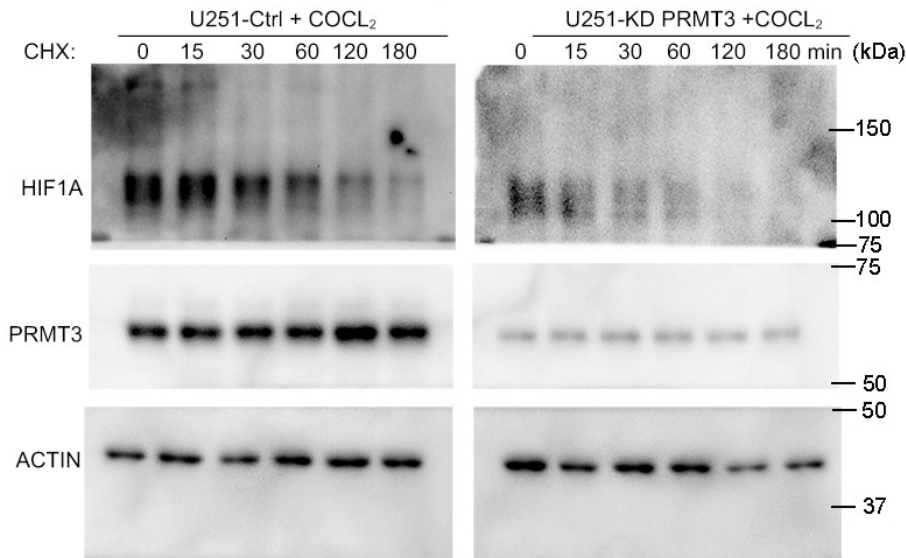

Figure 7H

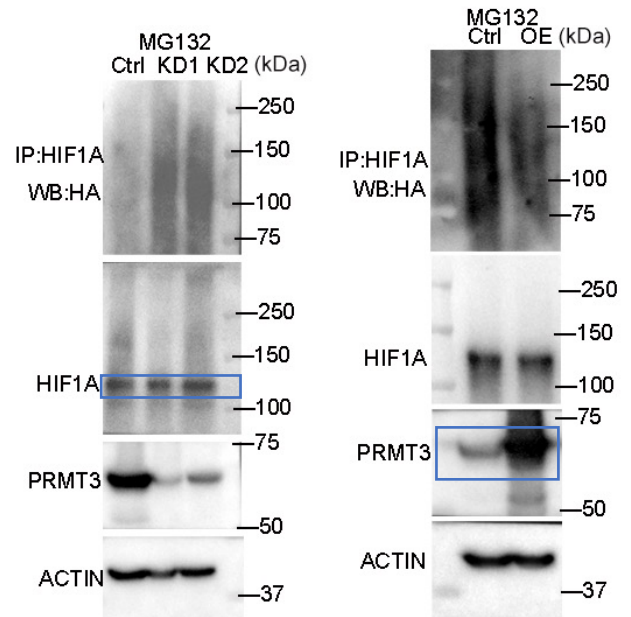

Supplement: 41419_2022_5389_MOESM7_ESM.pdf [file 41419_2022_5389_MOESM7_ESM.pdf]
